# Supplementary material for: Reprogramming of DNA methylation is linked to successful human preimplantation development
Source: PubMed Central journal article supplement (PMC8460514; doi:10.1007/s00418-021-02008-6), 2021-06-27
Supplement: 418_2021_2008_MOESM1_ESM.pdf [file 418_2021_2008_MOESM1_ESM.pdf]

# **Reprogramming of DNA methylation is linked to successful human preimplantation development**

Julia Arand<sup>1,2,3</sup>, Renee A. Reijo Pera<sup>2,4,5,#</sup> and Mark Wossidlo<sup>1,2,4,5,\$</sup>

<sup>1</sup>Center of Anatomy and Cell Biology, Department of Cell and Developmental Biology, Medical University of Vienna, 1090 Vienna, Austria

<sup>2</sup>Department of Genetics, <sup>3</sup>Pediatrics and <sup>4</sup>Obstetrics & Gynecology, Stanford University, Stanford, CA 94305, USA

<sup>5</sup>Institute for Stem Cell Biology and Regenerative Medicine, Stanford University, Stanford, CA 94305, USA

#Current address: McLaughlin Research Institute, Great Falls, MT 59405, USA

\$Correspondence to: [mark.wossidlo@meduniwien.ac.at](mailto:mark.wossidlo@meduniwien.ac.at)

## **Supplementary information list:**

**Supplementary Fig. 1:** Comparison of 5mC, 5hmC, 5fC, and 5caC paternal vs maternal antibody signal ratios of human and mouse zygotes.

**Supplementary Fig. 2:** 5mC-, 5hmC-, and Nanog-IF in human blastocysts.

**Supplementary Fig. 3:** 5mC- and 5hmC-IF of time-lapse imaged 4-cell embryos.

**Supplementary Table S1:** 5mC, 5hmC, 5fC, and 5caC antibody signal ratios of parental pronuclei in human G2-phase zygotes.

**Supplementary Table S2:** 5mC and 5hmC antibody signal intensities of time-lapse imaged human 4-cell embryos.

**Supplementary Table S3:** 5mC and 5caC antibody signal intensities of time-lapse imaged human 4-cell embryos.

**Supplementary Movie S1:** Time-lapse movie (32 fps) of human embryos imaged every 5 min used to determine normal and abnormal cell cycle parameters. Embryos were subsequently analyzed for 5mC and 5hmC by IF.

**Supplementary Movie S2:** Time-lapse movie (32 fps) of human embryos imaged every 5 min used to determine normal and abnormal cell cycle parameters. Embryos were subsequently analyzed for 5mC and 5caC by IF.

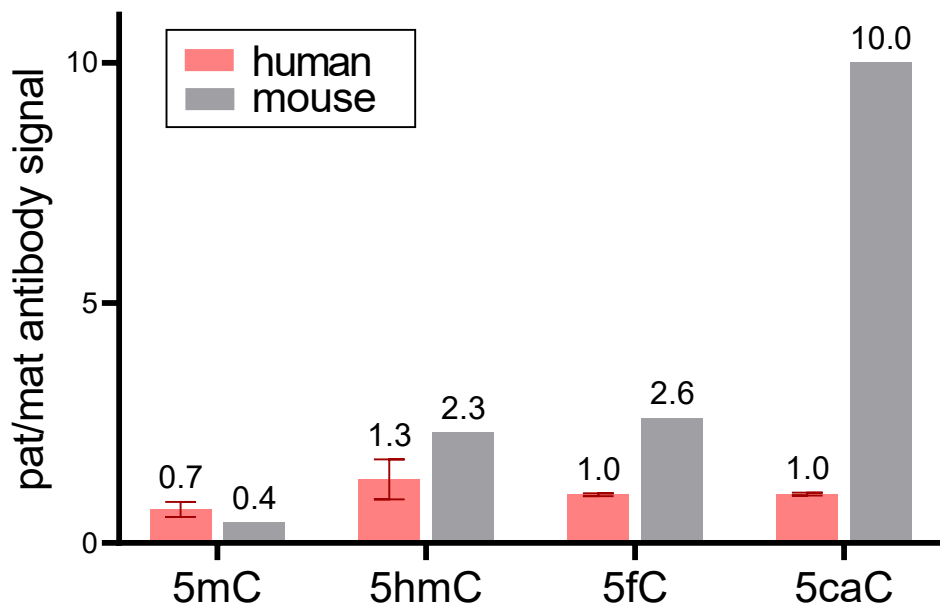

**Supplementary Fig. 1: Comparison of 5mC, 5hmC, 5fC, and 5caC paternal vs maternal antibody signal ratios of human and mouse zygotes.**

Average signal intensity ratios for mouse zygotes were derived from Wossidlo *et al.* 2011 (5mC and 5hmC) and Inoue *et al.* 2011 (5fC and 5caC).

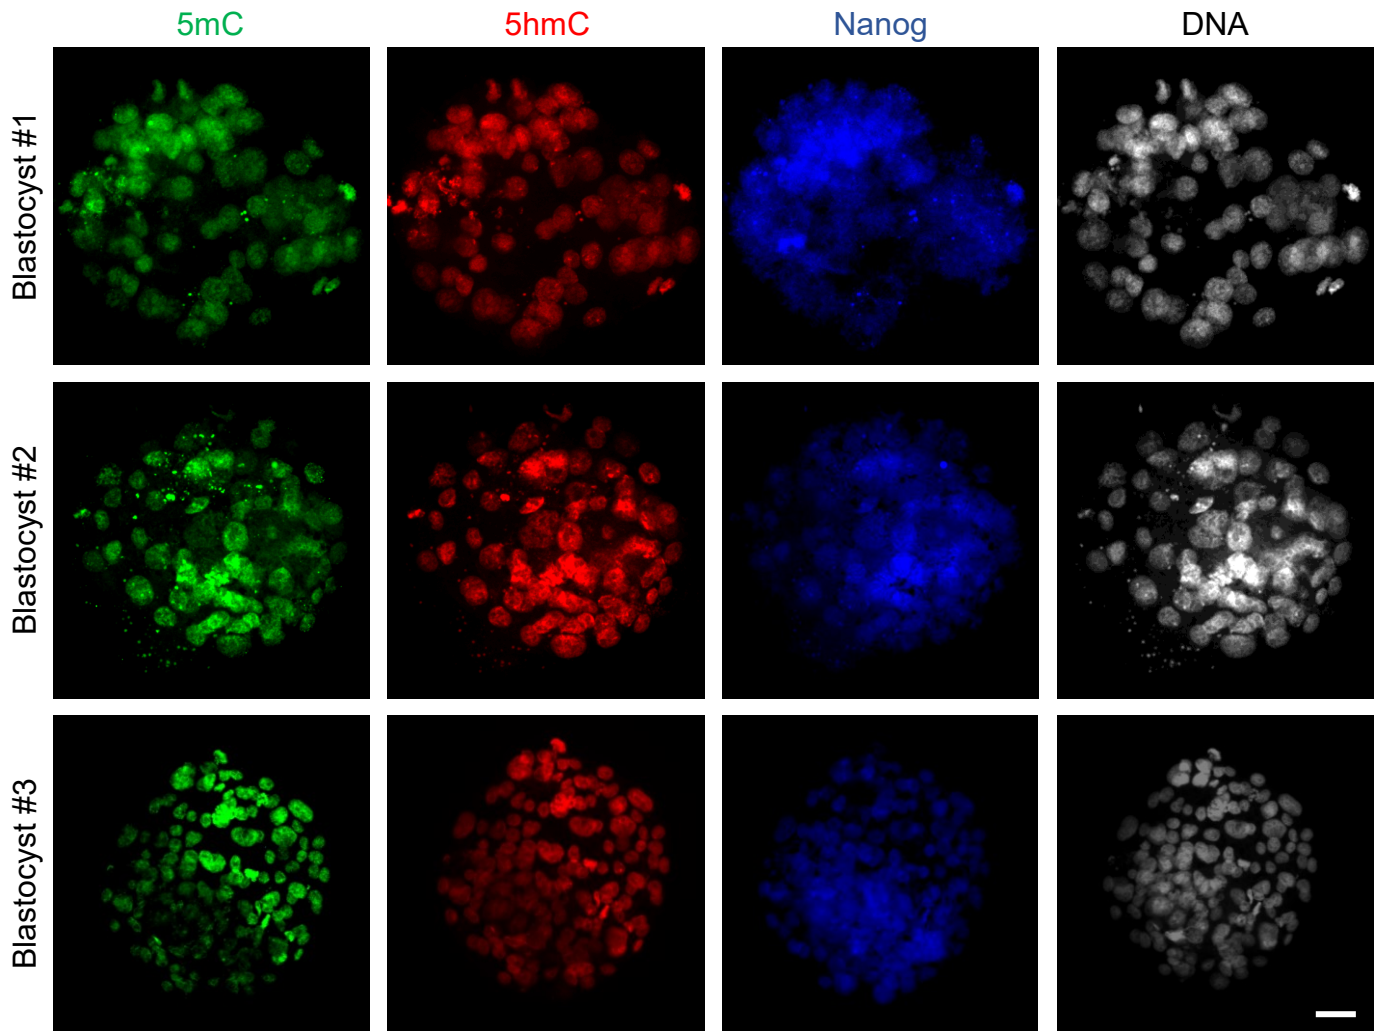

**Supplementary Fig. 2: 5mC-, 5hmC-, and Nanog-IF in human blastocysts.**

Representative images of human blastocysts co-stained with antibodies against 5mC, 5hmC and Nanog. Stronger 5mC- and 5hmC-signals were observed in the ICM (cells with stronger Nanog signal) in early developing blastocysts #1 and #2, whereas lower 5mC- and 5hmC-signals were detected in the ICM in the late developing blastocyst #3. Note that Nanog staining is of lower quality in these samples, since the blastocysts underwent denaturing conditions for staining with 5mC- and 5hmC-antibodies. Scale bar = 20 $\mu$ m.

**a**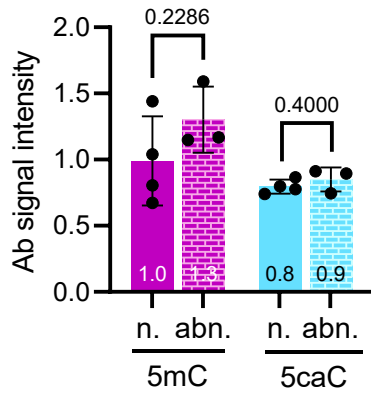**b**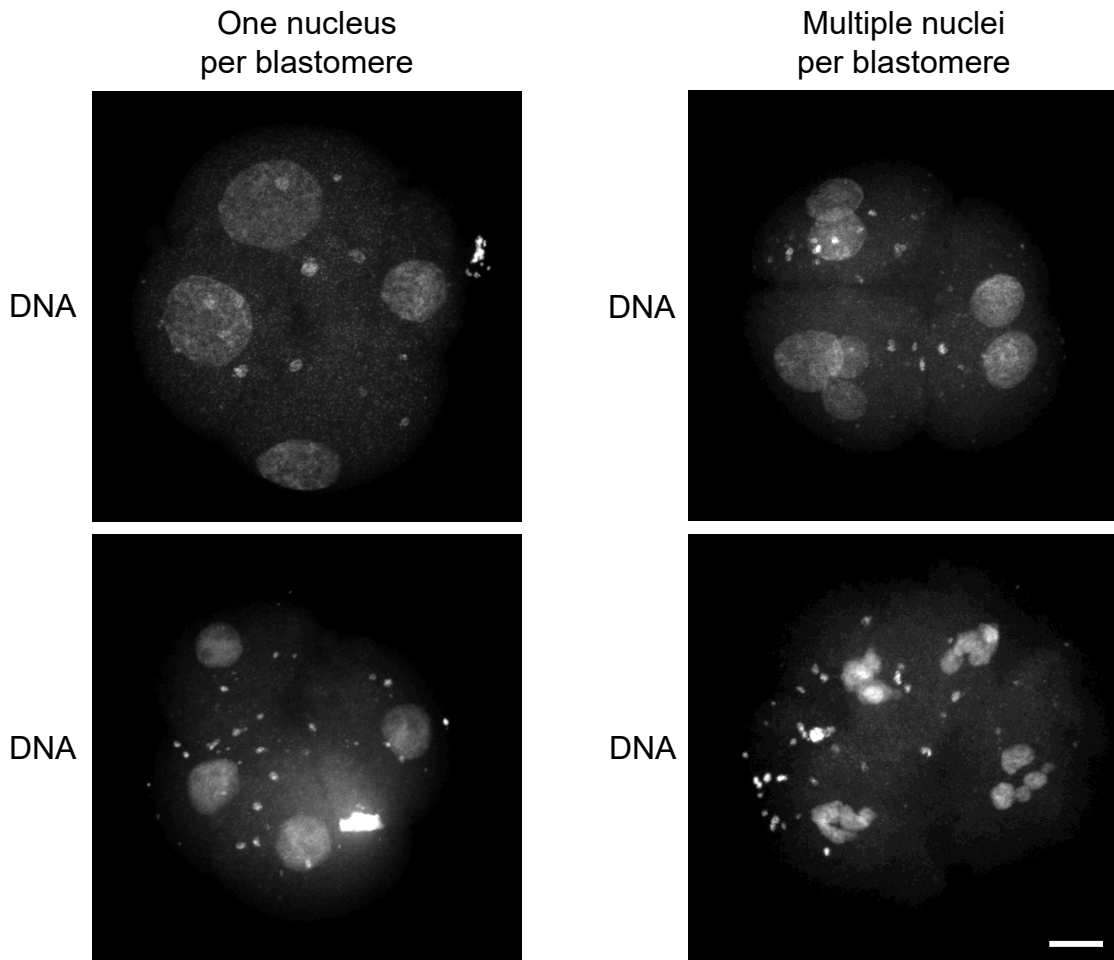

**Supplementary Fig. 3: 5mC- and 5hmC-IF of time-lapse imaged 4-cell embryos.**

**a:** Average 5mC- and 5hmC-signal intensities of 4-cell embryos with normal (n.) and abnormal (abn.) cell cycle parameters normalized to DNA signals. Each dot represents a single 4-cell embryo. P-values were calculated using Mann-Whitney test.

**b:** DNA staining of the four 4-cell embryos with normal cell cycle parameters from panel **a** subdivided into 4-cell embryos with one nucleus or multiple nuclei per blastomere. Scale bar = 20 $\mu$ m.

**Supplementary Table S1: 5mC, 5hmC, 5fC, and 5caC antibody signal ratios of parental pronuclei in human G2-phase zygotes.**

| Co-staining | Embryo | pat/mat 5mC | pat/mat 5hmC | pat/mat 5fC | pat/mat 5caC |
|-------------|--------|-------------|--------------|-------------|--------------|
| 5mC & 5hmC  | 1      | 0.838       | 1.283        |             |              |
|             | 2      | 0.761       | 1.403        |             |              |
|             | 3      | 0.589       | 1.332        |             |              |
|             | 4      | 0.506       | 1.012        |             |              |
|             | 5      | 0.838       | 0.939        |             |              |
|             | 6      | 0.631       | 1.130        |             |              |
|             | 7      | 0.336       | 2.187        |             |              |
| 5mC & 5fC   | 8      | 0.861       |              | 1.048       |              |
|             | 9      | 0.629       |              | 1.018       |              |
|             | 10     | 0.674       |              | 0.990       |              |
|             | 11     | 0.695       |              | 0.962       |              |
|             | 12     | 0.728       |              | 1.010       |              |
| 5mC & 5caC  | 13     | 0.553       |              |             | 1.034        |
|             | 14     | 0.754       |              |             | 1.017        |
|             | 15     | 0.989       |              |             | 1.018        |
|             | 16     | 0.650       |              |             | 0.983        |
|             | 17     | 0.780       |              |             | 1.007        |
|             | 18     | 0.688       |              |             | 1.035        |
|             | 19     | 0.559       |              |             | 0.978        |
|             | 20     | 0.946       |              |             | 1.077        |

**Supplementary Table S2: 5mC and 5hmC antibody signal intensities of time-lapse imaged human 4-cell embryos.**

| Embryo | Characteristics         | 5mC signal | 5caC signal |
|--------|-------------------------|------------|-------------|
| A1     | abnormal                | 1.172      | 1.407       |
| A2     | arrested: 2 blastomeres | na         | na          |
| A3     | abnormal: 3 blastomeres | na         | na          |
| A4     | abnormal                | 0.869      | 0.786       |
| B1     | arrested: zygote        | na         | na          |
| B2     | abnormal: 3 blastomeres | na         | na          |
| B3     | arrested: zygote        | na         | na          |
| B4     | normal                  | 0.449      | 0.373       |
| C1     | arrested: zygote        | na         | na          |
| C2     | abnormal                | 1.2        | 1.001       |
| C3     | na (out of focus)       | na         | na          |
| D1     | abnormal                | 1.041      | 1.184       |
| D2     | abnormal                | 1.09       | 1.155       |
| D3     | abnormal                | 1.077      | 1.37        |
| E1     | normal                  | 0.403      | 0.546       |
| E2     | abnormal                | 1.117      | 1.486       |
| E3     | abnormal                | 0.858      | 1.808       |

**Supplementary Table S3: 5mC and 5caC antibody signal intensities of time-lapse imaged human 4-cell embryos.**

| Embryo | Characteristics         | 5mC signal | 5caC signal |
|--------|-------------------------|------------|-------------|
| A1     | abnormal                | 1.591      | 0.895       |
| A2     | normal: multiple nuclei | 1.041      | 0.798       |
| B1     | abnormal: 5 blastomeres | na         | na          |
| B2     | normal                  | 0.672      | 0.867       |
| C1     | abnormal                | 1.168      | 0.911       |
| C2     | abnormal: 3 blastomeres | na         | na          |
| D1     | arrested: 2 blastomeres | na         | na          |
| D2     | normal                  | 0.805      | 0.741       |
| E1     | abnormal                | 1.149      | 0.746       |
| E2     | normal: multiple nuclei | 1.44       | 0.776       |



## Supplementary References

Wossidlo M, Nakamura T, Lepikhov K, Marques CJ, Zakhartchenko V, Boiani M, Arand J, Nakano T, Reik W and Walter J (2011) 5-Hydroxymethylcytosine in the mammalian zygote is linked with epigenetic reprogramming. *Nat Commun* 2:241. <http://doi.org/10.1038/ncomms1240>

Inoue A, Shen L, Dai Q, He C and Zhang Y (2011) Generation and replication-dependent dilution of 5fC and 5caC during mouse preimplantation development. *Cell Res* 21:1670-6. <http://doi.org/10.1038/cr.2011.189>
